# Supplementary material for: Safety and Efficacy of Early High Parenteral Lipid Supplementation in Preterm Infants: A Systematic Review and Meta-Analysis
Source: MDPI journal article supplement (doi:10.3390/nu13051535), 2021-05-02
Supplement: s1 [file s1]

## Search strategies for database searching

PubMed, EMBASE, and Cochrane were searched using separate comprehensive search strategies.

## Search strategies

### PubMed

| Number | Search query                                                                                                                                                                                                                                                                                                                                                                                                                                   | Results |
|--------|------------------------------------------------------------------------------------------------------------------------------------------------------------------------------------------------------------------------------------------------------------------------------------------------------------------------------------------------------------------------------------------------------------------------------------------------|---------|
| #1     | "Infant, Premature"[Mesh]                                                                                                                                                                                                                                                                                                                                                                                                                      | 56,391  |
| #2     | "Infant, Premature"[TW] OR "Infants, Premature"[TW] OR "Premature Infant"[TW] OR "Preterm Infants"[TW] OR "Infant, Preterm"[TW] OR "Infants, Preterm"[TW] OR "Preterm Infant"[TW] OR "Premature Infants"[TW] OR "Neonatal Prematurity"[TW] OR "Prematurity, Neonatal"[TW] OR "Premature"[TW]                                                                                                                                                   | 198,979 |
| #3     | "Infant, Extremely Premature"[Mesh]                                                                                                                                                                                                                                                                                                                                                                                                            | 2,604   |
| #4     | "Infant, Extremely Premature"[TW] OR "Extremely Premature Infant"[TW] OR "Infants, Extremely Premature"[TW] OR "Premature Infant, Extremely"[TW] OR "Premature Infants, Extremely"[TW] OR "Extremely Preterm Infants"[TW] OR "Extremely Preterm Infant"[TW] OR "Infant, Extremely Preterm"[TW] OR "Infants, Extremely Preterm"[TW] OR "Preterm Infant, Extremely"[TW] OR "Preterm Infants, Extremely"[TW] OR "Extremely Premature Infants"[TW] | 3,947   |
| #5     | "Premature Birth"[Mesh]                                                                                                                                                                                                                                                                                                                                                                                                                        | 14,129  |
| #6     | "Premature Birth"[TW] OR "Birth, Premature"[TW] OR "Births, Premature"[TW] OR "Premature Births"[TW] OR "Preterm Birth"[TW] OR "Birth, Preterm"[TW] OR "Births, Preterm"[TW] OR "Preterm Births"[TW] OR "Preterm"[TW] OR "Very Preterm Infants"[TW] OR "Very Preterm Infant"[TW]                                                                                                                                                               | 82,384  |
| #7     | "Infant, Low Birth Weight"[Mesh]                                                                                                                                                                                                                                                                                                                                                                                                               | 34,621  |
| #8     | "Infant, Low Birth Weight"[TW] OR "Low-Birth-Weight Infant"[TW] OR "Infant, Low-Birth-Weight"[TW] OR "Infants, Low-Birth-Weight"[TW] OR "Low Birth Weight Infant"[TW] OR "Low-Birth-Weight Infants"[TW] OR "Low Birth Weight"[TW] OR "Birth Weight, Low"[TW] OR "Birth Weights, Low"[TW] OR "Low Birth Weights"[TW]                                                                                                                            | 42,085  |
| #9     | "Infant, Very Low Birth Weight"[Mesh]                                                                                                                                                                                                                                                                                                                                                                                                          | 10,255  |
| #10    | "Infant, Very Low Birth Weight"[TW] OR "Very-Low-Birth-Weight Infant"[TW] OR "Infant, Very-Low-Birth-Weight"[TW] OR "Infants, Very-Low-Birth-Weight"[TW] OR "Very Low Birth Weight Infant"[TW] OR "Very-Low-Birth-Weight Infants"[TW] OR "Very Low Birth Weight"[TW]                                                                                                                                                                           | 12,114  |
| #11    | "Infant, Extremely Low Birth Weight"[Mesh]                                                                                                                                                                                                                                                                                                                                                                                                     | 1,906   |
| #12    | "Infant, Extremely Low Birth Weight"[TW] OR "Extremely Low Birth Weight Infant"[TW]                                                                                                                                                                                                                                                                                                                                                            | 2,053   |

|                |                                                                                                                                                                                                                                                                                                                                                                                                                                                                                                                                                                                                                                                                                                                                                                                                                                                                                                                                                                                                                                                                                                                                                                                                                                                                                                                                                                                                                                                                                                                                                                                                                                                                                                                                                                                                                                                                                                                                                                                                 |           |
|----------------|-------------------------------------------------------------------------------------------------------------------------------------------------------------------------------------------------------------------------------------------------------------------------------------------------------------------------------------------------------------------------------------------------------------------------------------------------------------------------------------------------------------------------------------------------------------------------------------------------------------------------------------------------------------------------------------------------------------------------------------------------------------------------------------------------------------------------------------------------------------------------------------------------------------------------------------------------------------------------------------------------------------------------------------------------------------------------------------------------------------------------------------------------------------------------------------------------------------------------------------------------------------------------------------------------------------------------------------------------------------------------------------------------------------------------------------------------------------------------------------------------------------------------------------------------------------------------------------------------------------------------------------------------------------------------------------------------------------------------------------------------------------------------------------------------------------------------------------------------------------------------------------------------------------------------------------------------------------------------------------------------|-----------|
| #13<br>Combine | ((((((((((("Infant, Premature"[Mesh]) OR ("Infant, Premature"[TW] OR "Infants, Premature"[TW] OR "Premature Infant"[TW] OR "Preterm Infants"[TW] OR "Infant, Preterm"[TW] OR "Infants, Preterm"[TW] OR "Preterm Infant"[TW] OR "Premature Infants"[TW] OR "Neonatal Prematurity"[TW] OR "Prematurity, Neonatal"[TW] OR "Premature"[TW])) OR ("Infant, Extremely Premature"[Mesh])) OR ("Infant, Extremely Premature"[TW] OR "Extremely Premature Infant"[TW] OR "Infants, Extremely Premature"[TW] OR "Premature Infant, Extremely"[TW] OR "Premature Infants, Extremely"[TW] OR "Extremely Preterm Infants"[TW] OR "Extremely Preterm Infant"[TW] OR "Infant, Extremely Preterm"[TW] OR "Infants, Extremely Preterm"[TW] OR "Preterm Infant, Extremely"[TW] OR "Preterm Infants, Extremely"[TW] OR "Extremely Premature Infants"[TW])) OR ("Premature Birth"[Mesh])) OR ("Premature Birth"[TW] OR "Birth, Premature"[TW] OR "Births, Premature"[TW] OR "Premature Births"[TW] OR "Preterm Birth"[TW] OR "Birth, Preterm"[TW] OR "Births, Preterm"[TW] OR "Preterm Births"[TW] OR "Preterm"[TW] OR "Very Preterm Infants"[TW] OR "Very Preterm Infant"[TW])) OR ("Infant, Low Birth Weight"[Mesh])) OR ("Infant, Low Birth Weight"[TW] OR "Low-Birth-Weight Infant"[TW] OR "Infant, Low-Birth-Weight"[TW] OR "Infants, Low-Birth-Weight"[TW] OR "Low Birth Weight Infant"[TW] OR "Low-Birth-Weight Infants"[TW] OR "Low Birth Weight"[TW] OR "Birth Weight, Low"[TW] OR "Birth Weights, Low"[TW] OR "Low Birth Weights"[TW])) OR ("Infant, Very Low Birth Weight"[Mesh])) OR ("Infant, Very Low Birth Weight"[TW] OR "Very-Low-Birth-Weight Infant"[TW] OR "Infant, Very-Low-Birth-Weight"[TW] OR "Infants, Very-Low-Birth-Weight"[TW] OR "Very Low Birth Weight Infant"[TW] OR "Very-Low-Birth-Weight Infants"[TW] OR "Very Low Birth Weight"[TW])) OR ("Infant, Extremely Low Birth Weight"[Mesh])) OR ("Infant, Extremely Low Birth Weight"[TW] OR "Extremely Low Birth Weight Infant"[TW])) | 243,169   |
| #14            | "Lipids"[Mesh]                                                                                                                                                                                                                                                                                                                                                                                                                                                                                                                                                                                                                                                                                                                                                                                                                                                                                                                                                                                                                                                                                                                                                                                                                                                                                                                                                                                                                                                                                                                                                                                                                                                                                                                                                                                                                                                                                                                                                                                  | 1,165,798 |
| #15            | "Lipids"[TW] OR "high lipid infusion"[TW] OR "high lipid"[TW] OR "lipid infusion"[TW] OR "lipid emulsion"[TW] OR "High Early Parenteral Lipid"[TW]                                                                                                                                                                                                                                                                                                                                                                                                                                                                                                                                                                                                                                                                                                                                                                                                                                                                                                                                                                                                                                                                                                                                                                                                                                                                                                                                                                                                                                                                                                                                                                                                                                                                                                                                                                                                                                              | 238,976   |
| #16            | "Fatty Acids"[Mesh]                                                                                                                                                                                                                                                                                                                                                                                                                                                                                                                                                                                                                                                                                                                                                                                                                                                                                                                                                                                                                                                                                                                                                                                                                                                                                                                                                                                                                                                                                                                                                                                                                                                                                                                                                                                                                                                                                                                                                                             | 456,416   |
| #17            | "Fatty Acids"[TW] OR "Acids, Fatty"[TW] OR "Fatty Acids, Esterified"[TW] OR "Acids, Esterified Fatty"[TW] OR "Esterified Fatty Acids"[TW] OR "Fatty Acids, Saturated"[TW] OR "Acids, Saturated Fatty"[TW] OR "Saturated Fatty Acids"[TW] OR "Aliphatic Acids"[TW] OR "Acids, Aliphatic"[TW]                                                                                                                                                                                                                                                                                                                                                                                                                                                                                                                                                                                                                                                                                                                                                                                                                                                                                                                                                                                                                                                                                                                                                                                                                                                                                                                                                                                                                                                                                                                                                                                                                                                                                                     | 215,477   |
| #18            | "Infusions, Intravenous"[Mesh]                                                                                                                                                                                                                                                                                                                                                                                                                                                                                                                                                                                                                                                                                                                                                                                                                                                                                                                                                                                                                                                                                                                                                                                                                                                                                                                                                                                                                                                                                                                                                                                                                                                                                                                                                                                                                                                                                                                                                                  | 55,101    |
| #19            | "Infusions, Intravenous"[TW] OR "Intravenous Infusions"[TW] OR "Infusion, Intravenous"[TW] OR "Intravenous Infusion"[TW] OR "Intravenous Drip"[TW] OR "Drip, Intravenous"[TW] OR "Drip Infusions"[TW] OR "Drip Infusion"[TW] OR "Infusion, Drip"[TW] OR "Infusions, Drip"[TW] OR "intravenous"[TW] OR "intravenous lipid emulsion"[TW]                                                                                                                                                                                                                                                                                                                                                                                                                                                                                                                                                                                                                                                                                                                                                                                                                                                                                                                                                                                                                                                                                                                                                                                                                                                                                                                                                                                                                                                                                                                                                                                                                                                          | 396,527   |
| #20            | "Infusions, Parenteral"[Mesh]                                                                                                                                                                                                                                                                                                                                                                                                                                                                                                                                                                                                                                                                                                                                                                                                                                                                                                                                                                                                                                                                                                                                                                                                                                                                                                                                                                                                                                                                                                                                                                                                                                                                                                                                                                                                                                                                                                                                                                   | 92,554    |
| #21            | "Infusions, Parenteral"[TW] OR "Parenteral Infusions"[TW] OR "Infusion, Parenteral"[TW] OR "Parenteral Infusion"[TW] OR "Intra-Abdominal Infusions"[TW] OR "Infusion, Intra-Abdominal"[TW] OR "Infusions, Intra-Abdominal"[TW] OR "Intra Abdominal Infusions"[TW] OR "Intra-Abdominal Infusion"[TW] OR "Peritoneal Infusions"[TW] OR "Infusion, Peritoneal"[TW] OR "Infusions, Peritoneal"[TW] OR "Peritoneal Infusion"[TW] OR "Intraperitoneal Infusions"[TW] OR "Infusion, Intraperitoneal"[TW] OR "Infusions, Intraperitoneal"[TW] OR "Intraperitoneal Infusion"[TW] OR "parenteral"[TW]                                                                                                                                                                                                                                                                                                                                                                                                                                                                                                                                                                                                                                                                                                                                                                                                                                                                                                                                                                                                                                                                                                                                                                                                                                                                                                                                                                                                     | 84,442    |
| #22            | "Parenteral Nutrition"[Mesh]                                                                                                                                                                                                                                                                                                                                                                                                                                                                                                                                                                                                                                                                                                                                                                                                                                                                                                                                                                                                                                                                                                                                                                                                                                                                                                                                                                                                                                                                                                                                                                                                                                                                                                                                                                                                                                                                                                                                                                    | 24,064    |
| #23            | "Parenteral Nutrition"[TW] OR "Nutrition, Parenteral"[TW] OR "Parenteral Feeding"[TW] OR "Feeding, Parenteral"[TW] OR "Feedings, Parenteral"[TW] OR "Parenteral Feedings"[TW] OR "Intravenous Feeding"[TW] OR "Feeding, Intravenous"[TW] OR "Feedings, Intravenous"[TW] OR "Intravenous Feedings"[TW]                                                                                                                                                                                                                                                                                                                                                                                                                                                                                                                                                                                                                                                                                                                                                                                                                                                                                                                                                                                                                                                                                                                                                                                                                                                                                                                                                                                                                                                                                                                                                                                                                                                                                           | 32,451    |

|                |                                                                                                                                                                                                                                                                                                                                                                                                                                                                                                                                                                                                                                                                                                                                                                                                                                                                                                                                                                                                                                                                                                                                                                                                                                                                                                                                                                                                                                                                                                                                                                                                                                                                                                                                                                                                                                                                                |           |
|----------------|--------------------------------------------------------------------------------------------------------------------------------------------------------------------------------------------------------------------------------------------------------------------------------------------------------------------------------------------------------------------------------------------------------------------------------------------------------------------------------------------------------------------------------------------------------------------------------------------------------------------------------------------------------------------------------------------------------------------------------------------------------------------------------------------------------------------------------------------------------------------------------------------------------------------------------------------------------------------------------------------------------------------------------------------------------------------------------------------------------------------------------------------------------------------------------------------------------------------------------------------------------------------------------------------------------------------------------------------------------------------------------------------------------------------------------------------------------------------------------------------------------------------------------------------------------------------------------------------------------------------------------------------------------------------------------------------------------------------------------------------------------------------------------------------------------------------------------------------------------------------------------|-----------|
| #24<br>Combine | ((((((("Lipids"[Mesh]) OR ("Lipids"[TW] OR "high lipid infusion"[TW] OR "high lipid"[TW] OR "lipid infusion"[TW] OR "lipid emulsion"[TW] OR "High Early Parenteral Lipid"[TW])) OR ("Fatty Acids"[Mesh]) OR ("Fatty Acids"[TW] OR "Acids, Fatty"[TW] OR "Fatty Acids, Esterified"[TW] OR "Acids, Esterified Fatty"[TW] OR "Esterified Fatty Acids"[TW] OR "Fatty Acids, Saturated"[TW] OR "Acids, Saturated Fatty"[TW] OR "Saturated Fatty Acids"[TW] OR "Aliphatic Acids"[TW] OR "Acids, Aliphatic"[TW])) OR ("Infusions, Intravenous"[Mesh]) OR ("Infusions, Intravenous"[TW] OR "Intravenous Infusions"[TW] OR "Infusion, Intravenous"[TW] OR "Intravenous Infusion"[TW] OR "Intravenous Drip"[TW] OR "Drip, Intravenous"[TW] OR "Drip Infusions"[TW] OR "Drip Infusion"[TW] OR "Infusion, Drip"[TW] OR "Infusions, Drip"[TW] OR "intravenous"[TW] OR "intravenous lipid emulsion"[TW])) OR ("Infusions, Parenteral"[Mesh]) OR ("Infusions, Parenteral"[TW] OR "Parenteral Infusions"[TW] OR "Infusion, Parenteral"[TW] OR "Parenteral Infusion"[TW] OR "Intra-Abdominal Infusions"[TW] OR "Infusion, Intra-Abdominal"[TW] OR "Infusions, Intra-Abdominal"[TW] OR "Intra Abdominal Infusions"[TW] OR "Intra-Abdominal Infusion"[TW] OR "Peritoneal Infusions"[TW] OR "Infusion, Peritoneal"[TW] OR "Infusions, Peritoneal"[TW] OR "Peritoneal Infusion"[TW] OR "Intraperitoneal Infusions"[TW] OR "Infusion, Intraperitoneal"[TW] OR "Infusions, Intraperitoneal"[TW] OR "Intraperitoneal Infusion"[TW] OR "parenteral"[TW])) OR ("Parenteral Nutrition"[Mesh]) OR ("Parenteral Nutrition"[TW] OR "Nutrition, Parenteral"[TW] OR "Parenteral Feeding"[TW] OR "Feeding, Parenteral"[TW] OR "Feedings, Parenteral"[TW] OR "Parenteral Feedings"[TW] OR "Intravenous Feeding"[TW] OR "Feeding, Intravenous"[TW] OR "Feedings, Intravenous"[TW] OR "Intravenous Feedings"[TW])) | 1,697,412 |
| #25<br>Combine | #13 AND #24                                                                                                                                                                                                                                                                                                                                                                                                                                                                                                                                                                                                                                                                                                                                                                                                                                                                                                                                                                                                                                                                                                                                                                                                                                                                                                                                                                                                                                                                                                                                                                                                                                                                                                                                                                                                                                                                    | 19,052    |
| #26<br>Limit   | #25 AND ("Randomized Controlled Trial" [Publication Type] OR "Controlled Clinical Trial" [Publication Type] OR "Randomized Controlled Trials as Topic"[Mesh] OR "Random Allocation"[Mesh] OR "Double-Blind Method"[Mesh] OR "Single-Blind Method"[Mesh] OR "Clinical Trial" [Publication Type] OR "Clinical Trials as Topic"[Mesh] OR "Clinical Trial"[TW] OR ((singl*[TW] OR doubl*[TW] OR trebl*[TW] OR tripl*[TW]) AND (mask*[TW] OR blind*[TW])) OR "Placebos"[Mesh] OR placebo*[TW] OR random*[TW] OR "Research Design"[Mesh:NoExp])                                                                                                                                                                                                                                                                                                                                                                                                                                                                                                                                                                                                                                                                                                                                                                                                                                                                                                                                                                                                                                                                                                                                                                                                                                                                                                                                      | 3,603     |

## EMBASE

| Number | Search query                                                                                                                                                                                                                                                                                                                                                                                                                                                                                                                                   | Results |
|--------|------------------------------------------------------------------------------------------------------------------------------------------------------------------------------------------------------------------------------------------------------------------------------------------------------------------------------------------------------------------------------------------------------------------------------------------------------------------------------------------------------------------------------------------------|---------|
| #1     | "prematurity"/exp                                                                                                                                                                                                                                                                                                                                                                                                                                                                                                                              | 112,379 |
| #2     | "Infant, Premature":ti,ab,kw,de OR "Infants, Premature":ti,ab,kw,de OR "Premature Infant":ti,ab,kw,de OR "Preterm Infants":ti,ab,kw,de OR "Infant, Preterm":ti,ab,kw,de OR "Infants, Preterm":ti,ab,kw,de OR "Preterm Infant":ti,ab,kw,de OR "Premature Infants":ti,ab,kw,de OR "Neonatal Prematurity":ti,ab,kw,de OR "Prematurity, Neonatal":ti,ab,kw,de OR "Premature":ti,ab,kw,de                                                                                                                                                           | 238,482 |
| #3     | "Infant, Extremely Premature":ti,ab,kw,de OR "Extremely Premature Infant":ti,ab,kw,de OR "Infants, Extremely Premature":ti,ab,kw,de OR "Premature Infant, Extremely":ti,ab,kw,de OR "Premature Infants, Extremely":ti,ab,kw,de OR "Extremely Preterm Infants":ti,ab,kw,de OR "Extremely Preterm Infant":ti,ab,kw,de OR "Infant, Extremely Preterm":ti,ab,kw,de OR "Infants, Extremely Preterm":ti,ab,kw,de OR "Preterm Infant, Extremely":ti,ab,kw,de OR "Preterm Infants, Extremely":ti,ab,kw,de OR "Extremely Premature Infants":ti,ab,kw,de | 2,766   |

|                |                                                                                                                                                                                                                                                                                                                                                                                                     |           |
|----------------|-----------------------------------------------------------------------------------------------------------------------------------------------------------------------------------------------------------------------------------------------------------------------------------------------------------------------------------------------------------------------------------------------------|-----------|
| #4             | "Premature Birth":ti,ab,kw,de OR "Birth, Premature":ti,ab,kw,de OR "Births, Premature":ti,ab,kw,de OR "Premature Births":ti,ab,kw,de OR "Preterm Birth":ti,ab,kw,de OR "Birth, Preterm":ti,ab,kw,de OR "Births, Preterm":ti,ab,kw,de OR "Preterm Births":ti,ab,kw,de OR "Preterm":ti,ab,kw,de OR "Very Preterm Infants":ti,ab,kw,de OR "Very Preterm Infant":ti,ab,kw,de                            | 112,378   |
| #5             | "low birth weight"/exp                                                                                                                                                                                                                                                                                                                                                                              | 62,516    |
| #6             | "Infant, Low Birth Weight":ti,ab,kw,de OR "Low-Birth-Weight Infant":ti,ab,kw,de OR "Infant, Low-Birth-Weight":ti,ab,kw,de OR "Infants, Low-Birth-Weight":ti,ab,kw,de OR "Low Birth Weight Infant":ti,ab,kw,de OR "Low-Birth-Weight Infants":ti,ab,kw,de OR "Low Birth Weight":ti,ab,kw,de OR "Birth Weight, Low":ti,ab,kw,de OR "Birth Weights, Low":ti,ab,kw,de OR "Low Birth Weights":ti,ab,kw,de | 58,660    |
| #7             | "very low birth weight"/exp                                                                                                                                                                                                                                                                                                                                                                         | 15,117    |
| #8             | "Infant, Very Low Birth Weight":ti,ab,kw,de OR "Very-Low-Birth-Weight Infant":ti,ab,kw,de OR "Infant, Very-Low-Birth-Weight":ti,ab,kw,de OR "Infants, Very-Low-Birth-Weight":ti,ab,kw,de OR "Very Low Birth Weight Infant":ti,ab,kw,de OR "Very-Low-Birth-Weight Infants":ti,ab,kw,de OR "Very Low Birth Weight":ti,ab,kw,de                                                                        | 14,956    |
| #9             | "extremely low birth weight"/exp                                                                                                                                                                                                                                                                                                                                                                    | 3,376     |
| #10            | "Infant, Extremely Low Birth Weight":ti,ab,kw,de OR "Extremely Low Birth Weight Infant":ti,ab,kw,de                                                                                                                                                                                                                                                                                                 | 358       |
| #11<br>Combine | #1 OR #2 OR #3 OR #4 OR #5 OR #6 OR #7 OR #8 OR #9 OR #10                                                                                                                                                                                                                                                                                                                                           | 339,138   |
| #12            | "lipid"/exp                                                                                                                                                                                                                                                                                                                                                                                         | 1,631,386 |
| #13            | "Lipids":ti,ab,kw,de OR "high lipid infusion":ti,ab,kw,de OR "high lipid":ti,ab,kw,de OR "lipid infusion":ti,ab,kw,de OR "lipid emulsion":ti,ab,kw,de OR "High Early Parenteral Lipid":ti,ab,kw,de                                                                                                                                                                                                  | 198,369   |
| #14            | "fatty acid"/exp                                                                                                                                                                                                                                                                                                                                                                                    | 600,478   |
| #15            | "Fatty Acids":ti,ab,kw,de OR "Acids, Fatty":ti,ab,kw,de OR "Fatty Acids, Esterified":ti,ab,kw,de OR "Acids, Esterified Fatty":ti,ab,kw,de OR "Esterified Fatty Acids":ti,ab,kw,de OR "Fatty Acids, Saturated":ti,ab,kw,de OR "Acids, Saturated Fatty":ti,ab,kw,de OR "Saturated Fatty Acids":ti,ab,kw,de OR "Aliphatic Acids":ti,ab,kw,de OR "Acids, Aliphatic":ti,ab,kw,de                         | 171,049   |
| #16            | "intravenous drug administration"/exp                                                                                                                                                                                                                                                                                                                                                               | 383,121   |

|                |                                                                                                                                                                                                                                                                                                                                                                                                                                                                                                                                                                                                                                                                                                                                                                                                                                                                                                                                                                                                                                                                                                                                                                                                                                                                                                                                                                                                                                                                                                                                                                                                                                                                                                                                                                                                                                                                                                                                                                                                                                                           |           |
|----------------|-----------------------------------------------------------------------------------------------------------------------------------------------------------------------------------------------------------------------------------------------------------------------------------------------------------------------------------------------------------------------------------------------------------------------------------------------------------------------------------------------------------------------------------------------------------------------------------------------------------------------------------------------------------------------------------------------------------------------------------------------------------------------------------------------------------------------------------------------------------------------------------------------------------------------------------------------------------------------------------------------------------------------------------------------------------------------------------------------------------------------------------------------------------------------------------------------------------------------------------------------------------------------------------------------------------------------------------------------------------------------------------------------------------------------------------------------------------------------------------------------------------------------------------------------------------------------------------------------------------------------------------------------------------------------------------------------------------------------------------------------------------------------------------------------------------------------------------------------------------------------------------------------------------------------------------------------------------------------------------------------------------------------------------------------------------|-----------|
| #17            | "Infusions, Intravenous":ti,ab,kw,de OR "Intravenous Infusions":ti,ab,kw,de OR "Infusion, Intravenous":ti,ab,kw,de OR "Intravenous Infusion":ti,ab,kw,de OR "Intravenous Drip":ti,ab,kw,de OR "Drip, Intravenous":ti,ab,kw,de OR "Drip Infusions":ti,ab,kw,de OR "Drip Infusion":ti,ab,kw,de OR "Infusion, Drip":ti,ab,kw,de OR "Infusions, Drip":ti,ab,kw,de OR "intravenous":ti,ab,kw,de OR "intravenous lipid emulsion":ti,ab,kw,de OR "administration, intravenous":ti,ab,kw,de OR "drug administration, intravenous":ti,ab,kw,de OR "infusion, intravenous":ti,ab,kw,de OR "infusions, intravenous":ti,ab,kw,de OR "injection, intravenous":ti,ab,kw,de OR "injections, intravenous":ti,ab,kw,de OR "intravenous administration":ti,ab,kw,de OR "intravenous bolus administration":ti,ab,kw,de OR "intravenous bolus drug administration":ti,ab,kw,de OR "intravenous bolus injection":ti,ab,kw,de OR "intravenous dose":ti,ab,kw,de OR "intravenous drip":ti,ab,kw,de OR "intravenous drip administration":ti,ab,kw,de OR "intravenous drip infusion":ti,ab,kw,de OR "intravenous drip injection":ti,ab,kw,de OR "intravenous fluid administration":ti,ab,kw,de OR "intravenous fluid therapy":ti,ab,kw,de OR "intravenous infusion":ti,ab,kw,de OR "intravenous infusions":ti,ab,kw,de OR "intravenous injection":ti,ab,kw,de OR "intravenous injections":ti,ab,kw,de OR "intravenous medication":ti,ab,kw,de OR "intravenous therapy":ti,ab,kw,de OR "intravenous transfusion":ti,ab,kw,de OR "iv administration":ti,ab,kw,de OR "IV drug administration":ti,ab,kw,de OR "IV drug delivery":ti,ab,kw,de OR "IV drug injection":ti,ab,kw,de OR "IV drug therapy":ti,ab,kw,de OR "iv fluid administration":ti,ab,kw,de OR "iv infusion":ti,ab,kw,de OR "iv injection":ti,ab,kw,de OR "IV medication":ti,ab,kw,de OR "iv transfusion":ti,ab,kw,de OR "vein infusion":ti,ab,kw,de OR "vein injection":ti,ab,kw,de OR "venous drip":ti,ab,kw,de OR "venous infusion":ti,ab,kw,de OR "venous injection":ti,ab,kw,de OR "venous transfusion":ti,ab,kw,de | 714,962   |
| #18            | "parenteral drug administration"/exp                                                                                                                                                                                                                                                                                                                                                                                                                                                                                                                                                                                                                                                                                                                                                                                                                                                                                                                                                                                                                                                                                                                                                                                                                                                                                                                                                                                                                                                                                                                                                                                                                                                                                                                                                                                                                                                                                                                                                                                                                      | 777,606   |
| #19            | "Infusions, Parenteral":ti,ab,kw,de OR "Parenteral Infusions":ti,ab,kw,de OR "Infusion, Parenteral":ti,ab,kw,de OR "Parenteral Infusion":ti,ab,kw,de OR "Intra-Abdominal Infusions":ti,ab,kw,de OR "Infusion, Intra-Abdominal":ti,ab,kw,de OR "Infusions, Intra-Abdominal":ti,ab,kw,de OR "Intra Abdominal Infusions":ti,ab,kw,de OR "Intra-Abdominal Infusion":ti,ab,kw,de OR "Peritoneal Infusions":ti,ab,kw,de OR "Infusion, Peritoneal":ti,ab,kw,de OR "Infusions, Peritoneal":ti,ab,kw,de OR "Peritoneal Infusion":ti,ab,kw,de OR "Intraperitoneal Infusions":ti,ab,kw,de OR "Infusion, Intraperitoneal":ti,ab,kw,de OR "Infusions, Intraperitoneal":ti,ab,kw,de OR "Intraperitoneal Infusion":ti,ab,kw,de OR "parenteral":ti,ab,kw,de OR "drug administration, parenteral":ti,ab,kw,de OR "hypodermic drug administration":ti,ab,kw,de OR "infusion, parenteral":ti,ab,kw,de OR "infusions, parenteral":ti,ab,kw,de OR "parenteral administration":ti,ab,kw,de OR "parenteral delivery":ti,ab,kw,de OR "parenteral dosage":ti,ab,kw,de OR "parenteral dose":ti,ab,kw,de OR "parenteral drug delivery":ti,ab,kw,de OR "parenteral drug infusion":ti,ab,kw,de OR "parenteral drug therapy":ti,ab,kw,de OR "parenteral infusion":ti,ab,kw,de OR "parenteral infusions":ti,ab,kw,de OR "parenteral injection":ti,ab,kw,de OR "parenteral medication":ti,ab,kw,de OR "parenteral therapy":ti,ab,kw,de OR "parenteral treatment":ti,ab,kw,de                                                                                                                                                                                                                                                                                                                                                                                                                                                                                                                                                                                                              | 92,152    |
| #20            | "parenteral nutrition"/exp                                                                                                                                                                                                                                                                                                                                                                                                                                                                                                                                                                                                                                                                                                                                                                                                                                                                                                                                                                                                                                                                                                                                                                                                                                                                                                                                                                                                                                                                                                                                                                                                                                                                                                                                                                                                                                                                                                                                                                                                                                | 50,428    |
| #21            | "Parenteral Nutrition":ti,ab,kw,de OR "Nutrition, Parenteral":ti,ab,kw,de OR "Parenteral Feeding":ti,ab,kw,de OR "Feeding, Parenteral":ti,ab,kw,de OR "Feedings, Parenteral":ti,ab,kw,de OR "Parenteral Feedings":ti,ab,kw,de OR "Intravenous Feeding":ti,ab,kw,de OR "Feeding, Intravenous":ti,ab,kw,de OR "Feedings, Intravenous":ti,ab,kw,de OR "Intravenous Feedings":ti,ab,kw,de                                                                                                                                                                                                                                                                                                                                                                                                                                                                                                                                                                                                                                                                                                                                                                                                                                                                                                                                                                                                                                                                                                                                                                                                                                                                                                                                                                                                                                                                                                                                                                                                                                                                     | 52,374    |
| #22<br>Combine | #12 OR #13 OR #14 OR #15 OR #16 OR #17 OR #18 OR #19 OR #20 OR #21                                                                                                                                                                                                                                                                                                                                                                                                                                                                                                                                                                                                                                                                                                                                                                                                                                                                                                                                                                                                                                                                                                                                                                                                                                                                                                                                                                                                                                                                                                                                                                                                                                                                                                                                                                                                                                                                                                                                                                                        | 2,803,013 |
| #23<br>Combine | #11 AND #22                                                                                                                                                                                                                                                                                                                                                                                                                                                                                                                                                                                                                                                                                                                                                                                                                                                                                                                                                                                                                                                                                                                                                                                                                                                                                                                                                                                                                                                                                                                                                                                                                                                                                                                                                                                                                                                                                                                                                                                                                                               | 35,621    |

|              |                                           |       |
|--------------|-------------------------------------------|-------|
| #24<br>Limit | #23 AND [randomized controlled trial]/lim | 1,876 |
|--------------|-------------------------------------------|-------|

## Cochrane

| Number         | Search query                                                                                                                                                                                                                                                                                                                                                                                                                                                                                               | Results |
|----------------|------------------------------------------------------------------------------------------------------------------------------------------------------------------------------------------------------------------------------------------------------------------------------------------------------------------------------------------------------------------------------------------------------------------------------------------------------------------------------------------------------------|---------|
| #1             | [mh "Infant, Premature"]                                                                                                                                                                                                                                                                                                                                                                                                                                                                                   | 3,745   |
| #2             | "Infant, Premature":ti,ab,kw OR "Infants, Premature":ti,ab,kw OR "Premature Infant":ti,ab,kw OR "Preterm Infants":ti,ab,kw OR "Infant, Preterm":ti,ab,kw OR "Infants, Preterm":ti,ab,kw OR "Preterm Infant":ti,ab,kw OR "Premature Infants":ti,ab,kw OR "Neonatal Prematurity":ti,ab,kw OR "Prematurity, Neonatal":ti,ab,kw OR "Premature":ti,ab,kw                                                                                                                                                        | 20,485  |
| #3             | [mh "Infant, Extremely Premature"]                                                                                                                                                                                                                                                                                                                                                                                                                                                                         | 186     |
| #4             | "Infant, Extremely Premature":ti,ab,kw OR "Extremely Premature Infant":ti,ab,kw OR "Infants, Extremely Premature":ti,ab,kw OR "Premature Infant, Extremely":ti,ab,kw OR "Premature Infants, Extremely":ti,ab,kw OR "Extremely Preterm Infants":ti,ab,kw OR "Extremely Preterm Infant":ti,ab,kw OR "Infant, Extremely Preterm":ti,ab,kw OR "Infants, Extremely Preterm":ti,ab,kw OR "Preterm Infant, Extremely":ti,ab,kw OR "Preterm Infants, Extremely":ti,ab,kw OR "Extremely Premature Infants":ti,ab,kw | 507     |
| #5             | [mh "Premature Birth"]                                                                                                                                                                                                                                                                                                                                                                                                                                                                                     | 1,453   |
| #6             | "Premature Birth":ti,ab,kw OR "Birth, Premature":ti,ab,kw OR "Births, Premature":ti,ab,kw OR "Premature Births":ti,ab,kw OR "Preterm Birth":ti,ab,kw OR "Birth, Preterm":ti,ab,kw OR "Births, Preterm":ti,ab,kw OR "Preterm Births":ti,ab,kw OR "Preterm":ti,ab,kw OR "Very Preterm Infants":ti,ab,kw OR "Very Preterm Infant":ti,ab,kw                                                                                                                                                                    | 13,895  |
| #7             | [mh "Infant, Low Birth Weight"]                                                                                                                                                                                                                                                                                                                                                                                                                                                                            | 2,175   |
| #8             | "Infant, Low Birth Weight":ti,ab,kw OR "Low-Birth-Weight Infant":ti,ab,kw OR "Infant, Low-Birth-Weight":ti,ab,kw OR "Infants, Low-Birth-Weight":ti,ab,kw OR "Low Birth Weight Infant":ti,ab,kw OR "Low-Birth-Weight Infants":ti,ab,kw OR "Low Birth Weight":ti,ab,kw OR "Birth Weight, Low":ti,ab,kw OR "Birth Weights, Low":ti,ab,kw OR "Low Birth Weights":ti,ab,kw                                                                                                                                      | 4,952   |
| #9             | [mh "Infant, Very Low Birth Weight"]                                                                                                                                                                                                                                                                                                                                                                                                                                                                       | 954     |
| #10            | "Infant, Very Low Birth Weight":ti,ab,kw OR "Very-Low-Birth-Weight Infant":ti,ab,kw OR "Infant, Very-Low-Birth-Weight":ti,ab,kw OR "Infants, Very-Low-Birth-Weight":ti,ab,kw OR "Very Low Birth Weight Infant":ti,ab,kw OR "Very-Low-Birth-Weight Infants":ti,ab,kw OR "Very Low Birth Weight":ti,ab,kw                                                                                                                                                                                                    | 2,201   |
| #11            | [mh "Infant, Extremely Low Birth Weight"]                                                                                                                                                                                                                                                                                                                                                                                                                                                                  | 118     |
| #12            | "Infant, Extremely Low Birth Weight":ti,ab,kw OR "Extremely Low Birth Weight Infant":ti,ab,kw                                                                                                                                                                                                                                                                                                                                                                                                              | 123     |
| #13<br>Combine | {OR #1-#12}                                                                                                                                                                                                                                                                                                                                                                                                                                                                                                | 25,845  |
| #14            | [mh "Lipids"]                                                                                                                                                                                                                                                                                                                                                                                                                                                                                              | 48,350  |
| #15            | "Lipids":ti,ab,kw OR "high lipid infusion":ti,ab,kw OR "high lipid":ti,ab,kw OR "lipid infusion":ti,ab,kw OR "lipid emulsion":ti,ab,kw OR "High Early Parenteral Lipid":ti,ab,kw                                                                                                                                                                                                                                                                                                                           | 17,168  |
| #16            | [mh "Fatty Acids"]                                                                                                                                                                                                                                                                                                                                                                                                                                                                                         | 22,257  |

|                |                                                                                                                                                                                                                                                                                                                                                                                                                                                                                                                                                                                                                                                                                       |         |
|----------------|---------------------------------------------------------------------------------------------------------------------------------------------------------------------------------------------------------------------------------------------------------------------------------------------------------------------------------------------------------------------------------------------------------------------------------------------------------------------------------------------------------------------------------------------------------------------------------------------------------------------------------------------------------------------------------------|---------|
| #17            | "Fatty Acids":ti,ab,kw OR "Acids, Fatty":ti,ab,kw OR "Fatty Acids, Esterified":ti,ab,kw OR "Acids, Esterified Fatty":ti,ab,kw OR "Esterified Fatty Acids":ti,ab,kw OR "Fatty Acids, Saturated":ti,ab,kw OR "Acids, Saturated Fatty":ti,ab,kw OR "Saturated Fatty Acids":ti,ab,kw OR "Aliphatic Acids":ti,ab,kw OR "Acids, Aliphatic":ti,ab,kw                                                                                                                                                                                                                                                                                                                                         | 13,306  |
| #18            | [mh "Infusions, Intravenous"]                                                                                                                                                                                                                                                                                                                                                                                                                                                                                                                                                                                                                                                         | 10,248  |
| #19            | "Infusions, Intravenous":ti,ab,kw OR "Intravenous Infusions":ti,ab,kw OR "Infusion, Intravenous":ti,ab,kw OR "Intravenous Infusion":ti,ab,kw OR "Intravenous Drip":ti,ab,kw OR "Drip, Intravenous":ti,ab,kw OR "Drip Infusions":ti,ab,kw OR "Drip Infusion":ti,ab,kw OR "Infusion, Drip":ti,ab,kw OR "Infusions, Drip":ti,ab,kw OR "intravenous":ti,ab,kw OR "intravenous lipid emulsion":ti,ab,kw                                                                                                                                                                                                                                                                                    | 85,606  |
| #20            | [mh "Infusions, Parenteral"]                                                                                                                                                                                                                                                                                                                                                                                                                                                                                                                                                                                                                                                          | 12,384  |
| #21            | "Infusions, Parenteral":ti,ab,kw OR "Parenteral Infusions":ti,ab,kw OR "Infusion, Parenteral":ti,ab,kw OR "Parenteral Infusion":ti,ab,kw OR "Intra-Abdominal Infusions":ti,ab,kw OR "Infusion, Intra-Abdominal":ti,ab,kw OR "Infusions, Intra-Abdominal":ti,ab,kw OR "Intra Abdominal Infusions":ti,ab,kw OR "Intra-Abdominal Infusion":ti,ab,kw OR "Peritoneal Infusions":ti,ab,kw OR "Infusion, Peritoneal":ti,ab,kw OR "Infusions, Peritoneal":ti,ab,kw OR "Peritoneal Infusion":ti,ab,kw OR "Intraperitoneal Infusions":ti,ab,kw OR "Infusion, Intraperitoneal":ti,ab,kw OR "Infusions, Intraperitoneal":ti,ab,kw OR "Intraperitoneal Infusion":ti,ab,kw OR "parenteral":ti,ab,kw | 10,293  |
| #22            | [mh "Parenteral Nutrition"]                                                                                                                                                                                                                                                                                                                                                                                                                                                                                                                                                                                                                                                           | 1,653   |
| #23            | "Parenteral Nutrition":ti,ab,kw OR "Nutrition, Parenteral":ti,ab,kw OR "Parenteral Feeding":ti,ab,kw OR "Feeding, Parenteral":ti,ab,kw OR "Feedings, Parenteral":ti,ab,kw OR "Parenteral Feedings":ti,ab,kw OR "Intravenous Feeding":ti,ab,kw OR "Feeding, Intravenous":ti,ab,kw OR "Feedings, Intravenous":ti,ab,kw OR "Intravenous Feedings":ti,ab,kw                                                                                                                                                                                                                                                                                                                               | 4,202   |
| #24<br>Combine | {OR #14-#23}                                                                                                                                                                                                                                                                                                                                                                                                                                                                                                                                                                                                                                                                          | 151,671 |
| #25<br>Combine | #13 AND #24                                                                                                                                                                                                                                                                                                                                                                                                                                                                                                                                                                                                                                                                           | 3,493   |
