# Supplementary figures and images for: Safety and Efficacy of Early High Parenteral Lipid Supplementation in Preterm Infants: A Systematic Review and Meta-Analysis
Source: MDPI journal article supplement (doi:10.3390/nu13051535), 2021-05-02

# Highest serum total bilirubin level in hospitalization, mg/dL

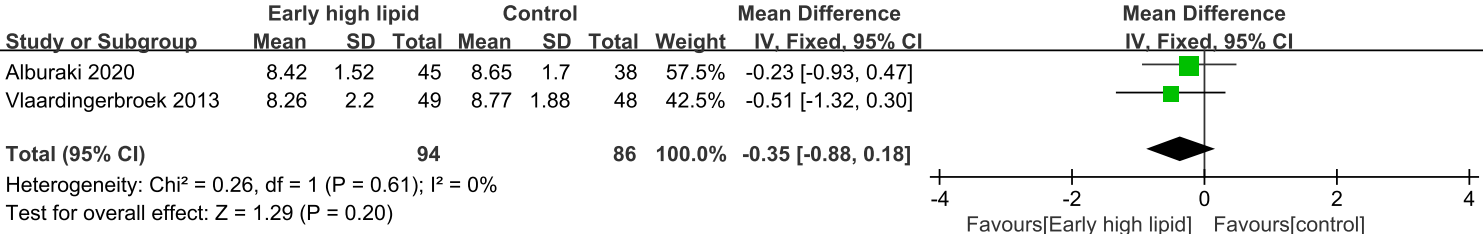

Supplement: s1 [file s1]
